# Supplementary material for: Hook length of the bacterial flagellum is optimized for maximal stability of the flagellar bundle
Source: PLoS Biol. 2018 Sep 6;16(9):e2006989. doi: 10.1371/journal.pbio.2006989 (PMC6126814; doi:10.1371/journal.pbio.2006989)
Supplement: S1 Text — (DOCX) [file pbio.2006989.s001.docx]

**S1 Text**

**Observations from modeling of single-cell behavior**

The angular velocity *ψ* is related to the tangential velocity *v* and the radius *s* of the curvature of the cell trajectory as making this parameter proportional to the cell velocity and inversely proportional to the radius of curvature. We observed that the angular velocity initially increases with hook-length. This corresponds to a decrease in the curvature radius of the trajectories, similar as observed before for sperm cells or other types of bacteria swimming near surfaces [1-5]. The angular velocity *ψ* decreases for longer trajectories, however, as a consequence of decreased run speed *v*. We also note that we were unable to reproduce the experimental observables of the short-hook (FliK335) che− mutant by a single parameter couple (*ψ*,*λ*) in the context of our run-and-tumble model, which suggested that the movement of those mutants is not diffusive (S7 Fig). We suggest that the observed heterogeneous hook-length distribution of the FliK335 mutant (S3 Fig) explains the poor fit to a single parameter couple.

**S1 Text References**

1. Elgeti J, Kaupp UB, Gompper G. Hydrodynamics of sperm cells near surfaces. Biophys J. 2010;99(4):1018-26. Epub 2010/08/18. doi: 10.1016/j.bpj.2010.05.015. PubMed PMID: 20712984; PubMed Central PMCID: PMCPMC2920720.

2. Di Leonardo R, Dell'Arciprete D, Angelani L, Iebba V. Swimming with an image. Phys Rev Lett. 2011;106(3):038101. Epub 2011/03/17. doi: 10.1103/PhysRevLett.106.038101. PubMed PMID: 21405301.

3. Hu J, Wysocki A, Winkler RG, Gompper G. Physical Sensing of Surface Properties by Microswimmers--Directing Bacterial Motion via Wall Slip. Sci Rep. 2015;5:9586. Epub 2015/05/21. doi: 10.1038/srep09586. PubMed PMID: 25993019; PubMed Central PMCID: PMCPMC4438609.

4. Hu J, Yang M, Gompper G, Winkler RG. Modelling the mechanics and hydrodynamics of swimming E. coli. Soft Matter. 2015;11(40):7867-76. Epub 2015/08/11. doi: 10.1039/c5sm01678a. PubMed PMID: 26256240.

5. Lauga E, DiLuzio WR, Whitesides GM, Stone HA. Swimming in circles: motion of bacteria near solid boundaries. Biophys J. 2006;90(2):400-12. Epub 2005/10/22. doi: 10.1529/biophysj.105.069401. PubMed PMID: 16239332; PubMed Central PMCID: PMCPMC1367047.
